# Supplementary material
Source: Springer Nature journal article supplement (https://www.springermedizin.de/resource/supplementary/13063_2010_614_MOESM6_ESM.pdf/9618872)

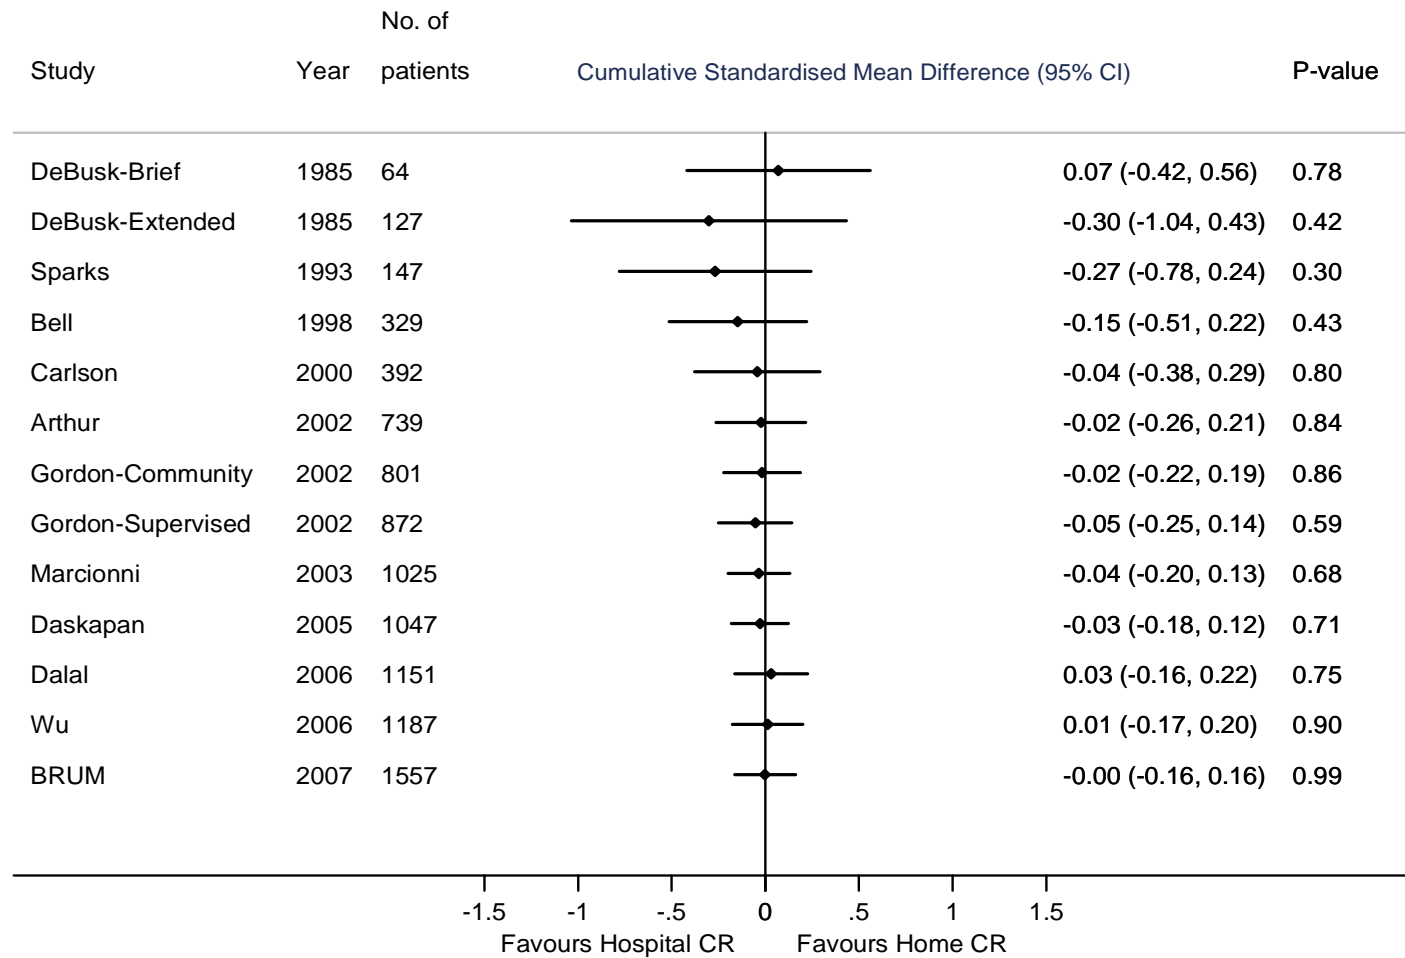

Supplement: MOESM6 [file 9618872]
